# Supplementary material for: Fabrication of plate-like Ta3N5 crystals through evaporation–deposition–re-evaporation of alkali halide fluxes onto tantalum substrates
Source: Royal Society of Chemistry journal article supplement (doi:10.1039/d0ce00806k), 2020-01-01
Supplement: d0ce00806k1.pdf [file d0ce00806k1.pdf]

## Supplementary Information

# Fabrication of Plate-like Ta<sub>3</sub>N<sub>5</sub> Crystals through an Evaporation-Deposition-Re-evaporation of Alkali Halide Fluxes onto Tantalum Substrates

*Hajime Wagata,<sup>1,2</sup> Minori Yanai,<sup>3</sup> Daewook Kim,<sup>4</sup> Sayaka Suzuki,<sup>2,3</sup> Mirabbos*

*Hojamberdiev,<sup>2,5</sup> Kunio Yubuta,<sup>6</sup> Chiaki Terashima<sup>4,7</sup> and Katsuya Teshima<sup>2,3,4,7\*</sup>*

<sup>1</sup>Department of Applied Chemistry, School of Science and Technology, Meiji University,  
Kawasaki 214-8571, Japan

<sup>2</sup>Department of Environmental Science and Technology, Faculty of Engineering, Shinshu  
University, Nagano 380-8553, Japan

<sup>3</sup>Department of Materials Chemistry, Faculty of Engineering, Shinshu University, Nagano  
380-8553, Japan

<sup>4</sup>Research Initiative for Supra-Materials, Shinshu University, Nagano 380-8553, Japan

<sup>5</sup>Institut für Chemie, Technische Universität Berlin, Straße des 17. Juni 135, 10623, Berlin,  
Germany

<sup>6</sup>Institute for Materials Research, Tohoku University, Sendai 980-8577, Japan

<sup>7</sup>Research Center for Space Colony, Tokyo University of Science, Chiba 278-8510, Japan

Tel.: +81-26-269-5556

Fax: +81-26-269-5550

\*E-mail address of corresponding author: [teshima@shinshu-u.ac.jp](mailto:teshima@shinshu-u.ac.jp)

**Table S1.** Experimental conditions for the growth of Ta<sub>3</sub>N<sub>5</sub> crystals by evaporation-deposition-re-evaporation of alkali halide fluxes.

| Run No. | Flux<br>(Molar Ratio) | Flux / g |       |       | Holding<br>Temp. / °C | Holding<br>Time / h |
|---------|-----------------------|----------|-------|-------|-----------------------|---------------------|
|         |                       | KF       | KCl   | KI    |                       |                     |
| 1       | KF (100)              | 0.500    | —     | —     | 900                   | 1                   |
| 2       | KCl (100)             | —        | 0.500 | —     | 900                   | 1                   |
| 3       | KI (100)              | —        | —     | 0.500 | 900                   | 1                   |
| 4       | KF-KI (55.2:44.8)     | 0.151    | —     | 0.349 | 900                   | 1                   |
| 5       | KF-KI (55.2:44.8)     | 0.151    | —     | 0.349 | 800                   | 0                   |
| 6       | KF-KI (55.2:44.8)     | 0.151    | —     | 0.349 | 900                   | 0                   |
| 7       | KF-KI (55.2:44.8)     | 0.151    | —     | 0.349 | 800                   | 1                   |

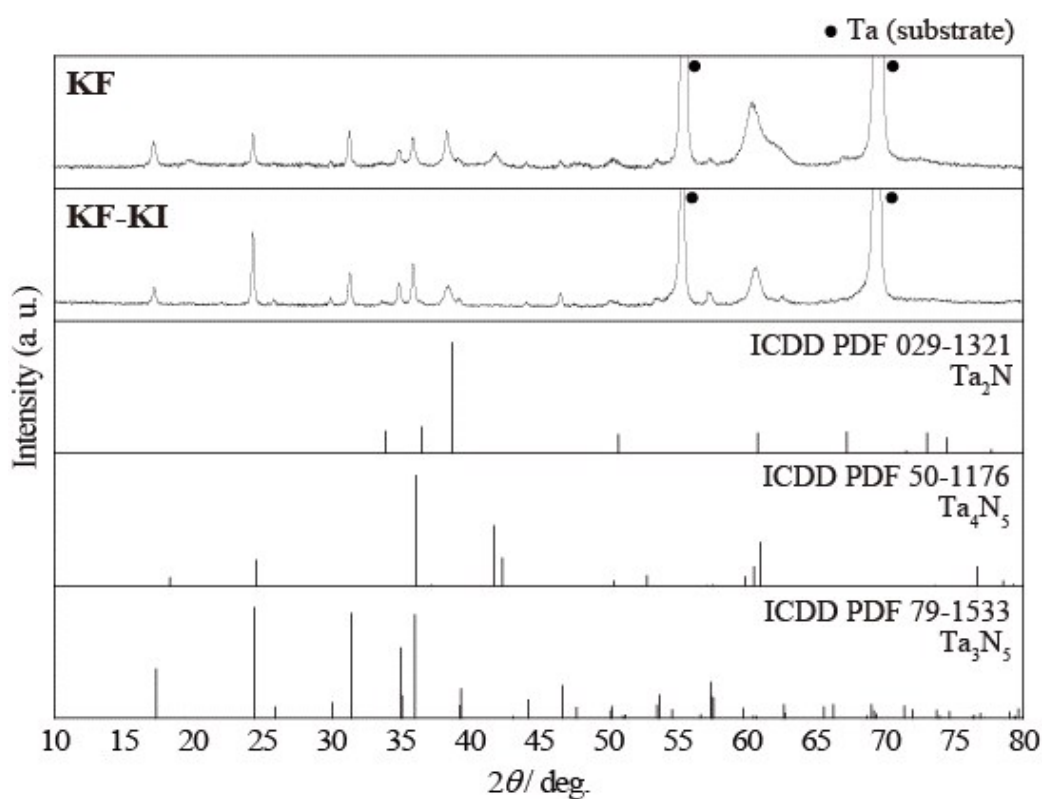

**Figure S1.** XRD patterns of crystal layers fabricated at 900°C for 1 h using KF and KF-KI fluxes, and reference peaks of Ta<sub>2</sub>N, Ta<sub>4</sub>N<sub>5</sub> and Ta<sub>3</sub>N<sub>5</sub>.

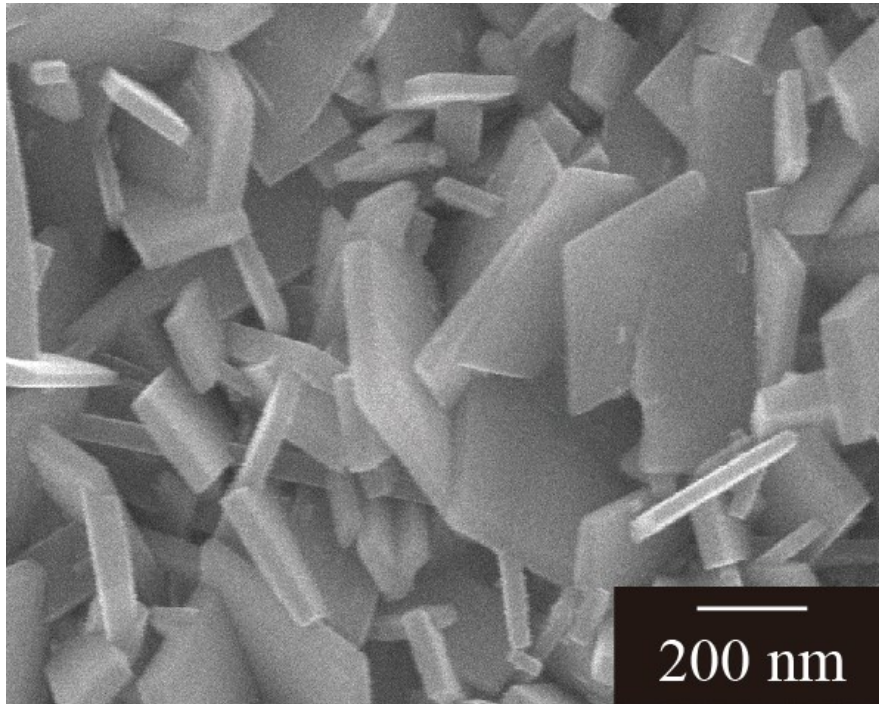

**Figure S2.** High-magnification surface SEM image of the Ta<sub>3</sub>N<sub>5</sub> crystal layer grown by evaporation-deposition-re-evaporation of the KF-KI flux.

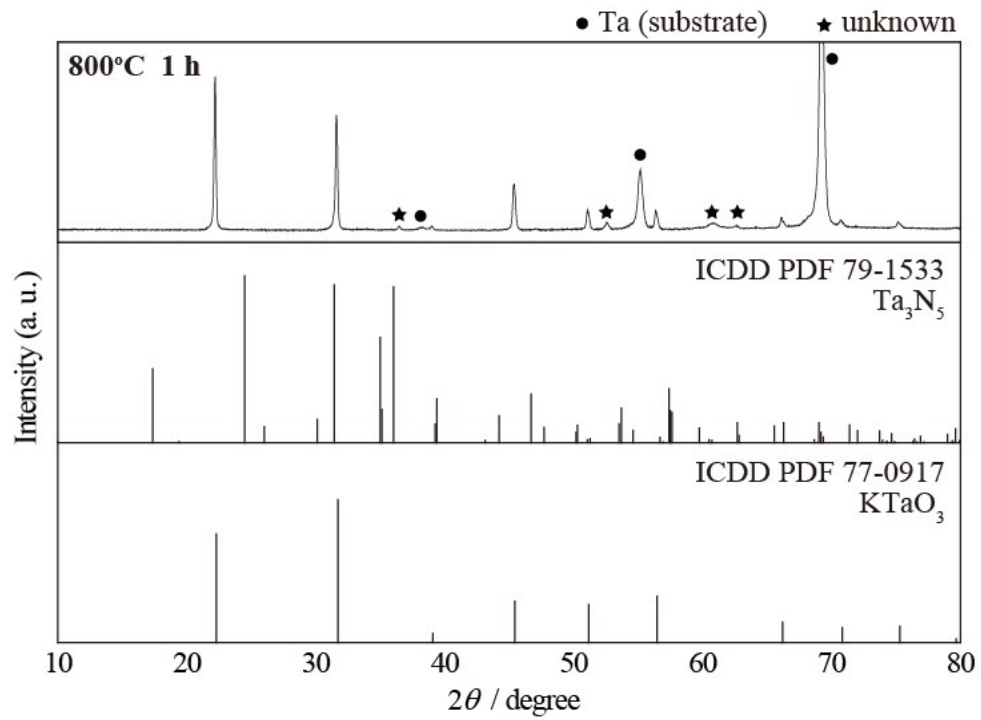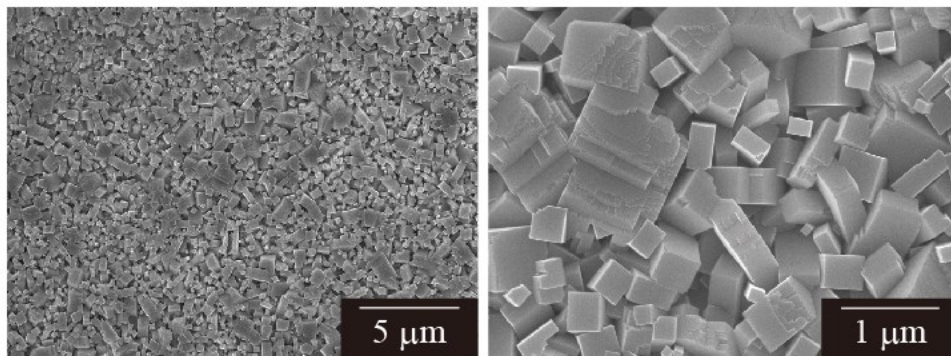

**Figure S3.** XRD pattern and surface SEM images of crystal layer grown at 800°C for 1 h using the KF-KI flux.
